# Supplementary material for: A fast and powerful swimming microrobot with a serrated tail enhanced propulsion interface
Source: Royal Society of Chemistry journal article supplement (doi:10.1039/c8nr04907f), 2018-01-01
Supplement: c8nr04907f1.pdf [file c8nr04907f1.pdf]

## Electronic Supplementary Information (ESI)

# A fast and powerful swimming microrobot with a serrated tail enhanced propulsion interface

Dengfeng Li,<sup>a</sup> Yanting Liu,<sup>a</sup> Yuanyuan Yang<sup>a</sup> and Yajing Shen<sup>a,b,\*</sup>

<sup>a</sup> Department of Biomedical Engineering, City University of Hong Kong, 83 Tat Chee Avenue, Hong Kong SAR, China.

<sup>b</sup> City University of Hong Kong Shenzhen Research Institute, Shenzhen 518057, China

\* Corresponding address: [yajishen@cityu.edu.hk](mailto:yajishen@cityu.edu.hk)

## 1. Supplementary Video Description

**Video S1.** Movement of three-channel swimming microrobot along a rectangular under the control of an external magnet.

**Video S2.** Movement of swimming microrobots with serrated tails in 20% H<sub>2</sub>O<sub>2</sub>.

**Video S3.** Huge cargo transport by the powerful four-channel swimming microrobot in 20% H<sub>2</sub>O<sub>2</sub>.

## 2. Supplementary Table Description

**Table S1** Moving speed of swimming microrobots with single-channel, double-channel, three-channel and four-channel serrated tails in 20% H<sub>2</sub>O<sub>2</sub> solution.

| Microrobots | Single-channel | Double-channel | Three-channel | Four-channel |
|-------------|----------------|----------------|---------------|--------------|
| Speed(μm/s) | 34             | 121            | 294           | 1026         |

### 3. Supplementary Figures Description

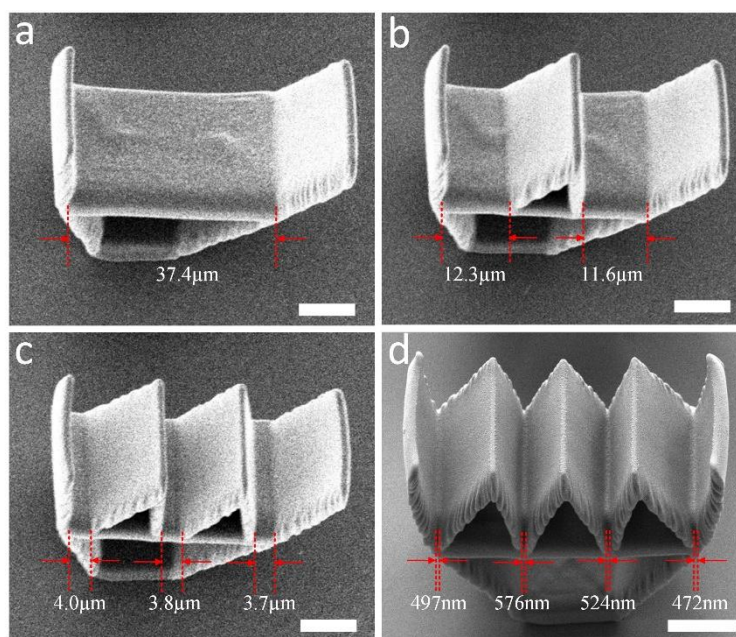

Fig. S1. SEM images of the swimming microrobots with serrated tails. (a) Single-channel tail with one flat of 37.4 μm, (b) Double-channel tail with two flats of 12.0 μm, (c) Three-channel tail with three flats of 3.8 μm, (d) Four-channel tail with four nanointerfaces of 517.2 μm. Scale bar: 10 μm.

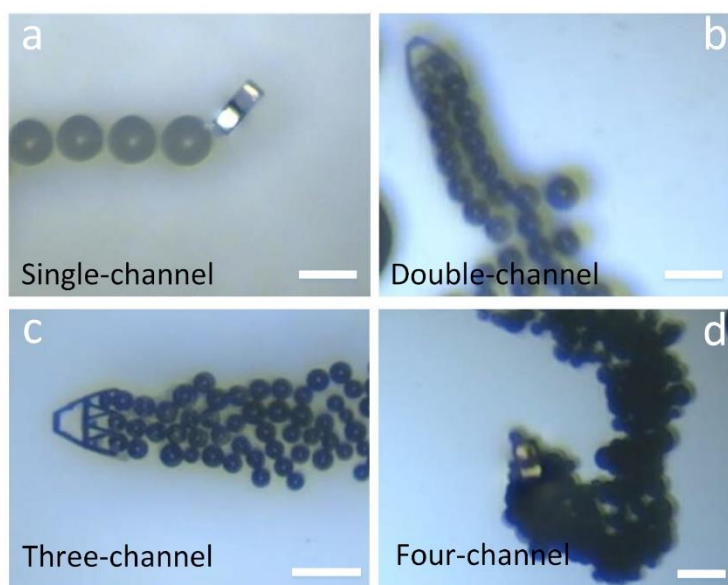

Fig. S2. Oxygen bubbles from the swimming microrobots during the catalytic reaction in 20% H<sub>2</sub>O<sub>2</sub>. (a) Single-channel tail with a line of oxygen bubbles, (b) Double-channel tail with two lines of oxygen bubbles, (c) Three-channel tail with three lines of oxygen bubbles, (d) Four-channel tail with four-lines of oxygen bubbles. Scale bar: 50 μm.

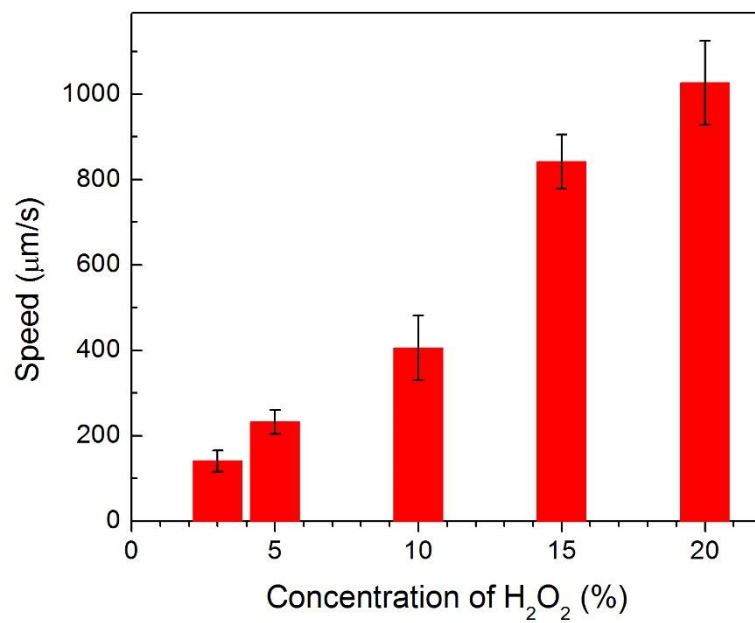

Fig. S3 Moving speed of the four-channel swimming microrobot as a function of the H<sub>2</sub>O<sub>2</sub> concentration.
